# Supplementary material for: Transcriptional Inhibition of AGPAT2 Induces Abnormal Lipid Metabolism and Oxidative Stress in the Liver of Nile Tilapia Oreochromis niloticus
Source: MDPI journal article supplement (doi:10.3390/antiox12030700), 2023-03-12
Supplement: s1 [file s1]

**Table S1.** Overview of reads for mRNA-seq and quality filtering.

| Sample | Raw Data |       | Valid Data |       | Valid | Q20%  | Q30%  | GC%   |
|--------|----------|-------|------------|-------|-------|-------|-------|-------|
|        |          |       |            |       | Ratio |       |       |       |
|        | Read     | Base  | Read       | Base  |       |       |       |       |
| AT2_1  | 36673256 | 5.50G | 34806726   | 5.22G | 94.91 | 99.95 | 98.67 | 46.50 |
| AT2_2  | 43542874 | 6.53G | 40051252   | 6.01G | 91.98 | 99.95 | 98.66 | 46    |
| AT2_3  | 49943870 | 7.49G | 46186856   | 6.93G | 92.48 | 99.95 | 98.58 | 46.50 |
| CON_1  | 45254716 | 6.79G | 38107378   | 5.72G | 84.21 | 99.95 | 98.54 | 45    |
| CON_2  | 45791028 | 6.87G | 42881204   | 6.43G | 93.65 | 99.95 | 98.62 | 46.50 |
| CON_3  | 53528600 | 8.03G | 51053306   | 7.66G | 95.38 | 99.75 | 97.05 | 47    |
